# Supplementary material for: Comprehensive analyses of genetic diversities and population structure of the Guizhou Dong group based on 44 Y-markers
Source: PeerJ. 2023 Sep 25;11:e16183. doi: 10.7717/peerj.16183 (PMC10538297; doi:10.7717/peerj.16183)
Supplement: Supplemental Information 2 [file peerj-11-16183-s002.xlsx]

## Sheet: Supplementary Table 2
Supplementary Table 2. Allele frequencies and gene diversities of 44 Y-markers loci in Guizhou Dong population (n=312).
Alleles	DYS19	DYS388	DYS389I	DYS389II	DYS390	DYS391	DYS392	DYS393	DYS437	DYS438	DYS439	DYS444	DYS447	DYS448	DYS449	DYS456	DYS458	DYS460	DYS481	DYS518	DYS522	DYS533	DYS549	DYS557	DYS570	DYS576	DYS593	DYS596	DYS627	DYS635	DYS643	DYS645	Y_GATA_H4	rs199815934	rs759551978	rs771783753	Genotypes	DYS527	Genotypes	DYF404S1	Genotypes	DYS385	Genotypes	DYF387S1
1																																		0.753205	0.0897436	0.0801282	17,17	0.00320513	12,12	0.00320513	10,17	0.00320513	26,27	0.00320513
2																																		0.246795	0.910256	0.919872	17,20	0.00320513	12,13	0.0192308	10,21	0.00320513	33,38	0.00320513
6						0.00641026																															18,20	0.00961538	12,14	0.025641	11,11	0.125	34,34	0.00641026
7																															0.00320513						18,22	0.00320513	12,15	0.0448718	11,12	0.0512821	34,37	0.00320513
8										0.00320513		0.00320513						0.00320513			0.00320513										0.121795	0.967949					19,20	0.00961538	12,16	0.0224359	11,16	0.00320513	34,38	0.00641026
9						0.00320513				0.00961538								0.173077			0.112179	0.0192308									0.0448718	0.0224359					19,22	0.00641026	12,17	0.00641026	11,17	0.00961538	34,39	0.00320513
10		0.0769231	0.00320513			0.849359		0.00641026	0.00320513	0.75641	0.144231	0.00320513						0.320513			0.102564	0.144231		0.00320513	0.00320513						0.198718	0.00961538	0.0705128				19,23	0.00320513	13,13	0.0961538	11,18	0.0160256	34,40	0.00641026
11						0.128205	0.179487	0.00641026		0.221154	0.378205	0.362179						0.416667			0.410256	0.483974	0.0769231								0.461538		0.336538				19,24	0.00320513	13,14	0.0641026	11,19	0.00641026	35,35	0.00320513
12	0.00320513	0.669872	0.474359			0.00961538	0.0384615	0.288462		0.00641026	0.413462	0.157051						0.0833333	0.00320513		0.326923	0.298077	0.541667				0.00320513				0.125		0.567308				20,20	0.105769	13,15	0.0544872	11,20	0.00641026	35,37	0.025641
13	0.0224359	0.233974	0.391026				0.330128	0.375	0.00320513	0.00320513	0.0448718	0.214744				0.00961538	0.00320513	0.00320513			0.0416667	0.0448718	0.275641	0.0288462						0.00320513	0.0416667		0.025641				20,21	0.0480769	13,16	0.0288462	12,12	0.0160256	35,38	0.025641
14	0.176282	0.00961538	0.121795				0.439103	0.192308	0.762821		0.0160256	0.198718				0.0608974	0.0224359				0.00320513	0.00961538	0.102564	0.467949	0.00320513	0.00320513		0.176282			0.00320513						20,22	0.0352564	13,17	0.00961538	12,13	0.00320513	35,39	0.0352564
15	0.403846	0.00641026	0.00641026			0.00320513	0.0128205	0.13141	0.221154		0.00320513	0.0512821		0.108974		0.573718	0.266026						0.00320513	0.195513	0.121795	0.0288462	0.50641	0.772436									20,23	0.0673077	13.2,14	0.00320513	12,14	0.0801282	35,40	0.0544872
16	0.307692								0.00641026			0.00641026		0.00641026		0.237179	0.182692							0.0833333	0.102564	0.240385	0.240385	0.0384615	0.00961538								20,24	0.0384615	14,14	0.134615	12,15	0.0128205	35,41	0.0128205
17	0.0833333		0.00320513											0.0160256		0.102564	0.214744							0.0512821	0.227564	0.266026	0.25	0.00961538	0.0192308								21,21	0.0576923	14,15	0.121795	12,16	0.0192308	36,36	0.0544872
18	0.00320513	0.00320513		0.00320513								0.00320513		0.230769		0.0160256	0.141026							0.0224359	0.25641	0.237179		0.00320513	0.0352564	0.00320513							21,22	0.0961538	14,16	0.025641	12,17	0.0288462	36,37	0.121795
19				0.0160256					0.00320513					0.269231			0.125		0.00320513					0.102564	0.185897	0.128205			0.0641026	0.0801282							21,23	0.0416667	15,15	0.25641	12,18	0.00961538	36,38	0.0801282
20													0.00641026	0.189103			0.0288462							0.0128205	0.0833333	0.0576923			0.137821	0.134615							21,24	0.025641	15,16	0.0448718	12,19	0.00961538	36,39	0.128205
21				0.00320513	0.00961538								0.00641026	0.163462			0.00641026		0.025641						0.00961538	0.0192308			0.211538	0.362179							21,25	0.00641026	15,17	0.00320513	12,20	0.0128205	36,40	0.0288462
22					0.0801282								0.0192308	0.0160256					0.150641						0.00641026	0.00320513			0.310897	0.214744							22,22	0.185897	16,16	0.0288462	12,21	0.00961538	36,41	0.00320513
23					0.596154								0.176282						0.227564										0.153846	0.115385							22,23	0.0512821	16,17	0.00320513	12,22	0.0224359	37,18	0.00320513
24					0.224359								0.205128		0.00320513				0.160256										0.0448718	0.0673077							22,24	0.0288462	13,14,16	0.00320513	13,13	0.0192308	37,37	0.0448718
25					0.0705128								0.326923		0.00641026				0.128205										0.00961538	0.0128205							22,25	0.0160256			13,14	0.160256	37,38	0.0192308
26				0.00641026	0.0192308								0.147436		0.0608974				0.0641026	0.00320513				0.00320513													22,26	0.00641026			13,15	0.00961538	37,39	0.0641026
27				0.0160256									0.0865385		0.0769231				0.198718										0.00320513	0.00641026							23,23	0.105769			13,17	0.0192308	37,40	0.0288462
28				0.266026									0.025641		0.0576923				0.0352564																		23,24	0.00641026			13,18	0.0352564	37,41	0.00641026
29				0.278846											0.0961538				0.00320513																		23,25	0.0128205			13,19	0.0448718	37.3,37.3	0.00320513
30				0.25641											0.326923																						23,26	0.00641026			13,20	0.0384615	38,38	0.0576923
31				0.141026											0.147436					0.00320513																	24,24	0.00961538			13,21	0.0192308	38,39	0.0801282
32				0.00961538											0.0929487					0.0833333																	19,20.3	0.00320513			13,22	0.00961538	38,40	0.0288462
33				0.00320513											0.0576923					0.0576923																	19,21,22	0.00320513			13,23	0.0160256	39,39	0.0352564
34															0.0384615					0.0320513																					14,14	0.00641026	39,40	0.00641026
35															0.0288462					0.0384615																					14,15	0.025641	39,41	0.00641026
36															0.00320513					0.137821																					14,16	0.0128205	40,40	0.00320513
37															0.00320513					0.115385																					14,17	0.0160256	40,41	0.00320513
38																				0.150641																					14,18	0.0384615	41,41	0.00320513
39																				0.105769																					14,19	0.0160256
40																				0.0929487																					14,20	0.00961538
41																				0.13141																					15,16	0.00641026
42																				0.0320513																					15,17	0.00961538
43																				0.00320513																					15,18	0.0160256
44																				0.00320513																					15,19	0.00320513
45																				0.00320513																					15,20	0.00320513
14.1																	0.00961538																								16,17	0.00320513
17.3																								0.00320513																	16,18	0.00320513
18.1																										0.00641026															16,19	0.00641026
18.3																								0.0192308																	16,21	0.00320513
19.1																										0.00641026
20.1																										0.00320513
37.2																				0.00641026
13,14																								0.00641026
Allele count	7	6	6	11	6	6	5	6	6	6	6	9	9	8	14	6	10	6	11	17	7	6	5	13	10	12	4	5	11	10	8	3	4	2	2	2		30		21		46		35
GD	0.705953	0.492044	0.609139	0.767623	0.584281	0.262841	0.666481	0.724153	0.370311	0.379998	0.665059	0.758286	0.792172	0.801921	0.837518	0.601946	0.81536	0.688948	0.840568	0.896879	0.702201	0.655742	0.616147	0.723081	0.818081	0.796665	0.625258	0.371877	0.810599	0.782608	0.715558	0.0626804	0.561073	0.373	0.1639	0.1479		0.917		0.8806		0.9399		0.9363
Note: For three Y-InDels, 1 and 2 indicated deletion and insertion variations of allele, respectively.
