# Supplementary material for: Comprehensive analyses of genetic diversities and population structure of the Guizhou Dong group based on 44 Y-markers
Source: PeerJ. 2023 Sep 25;11:e16183. doi: 10.7717/peerj.16183 (PMC10538297; doi:10.7717/peerj.16183)
Supplement: Supplemental Information 3 [file peerj-11-16183-s003.xlsx]

## Sheet: Supplementary Table 3
Supplementary Table 3. Loci information of different Y sets.
Loci	Goldeneye DNA Identification System Y PIus	Yfiler plus	PowerPlex Y23	Yfiler	minimal	PowerPlex Y
rs199815934	ü
DYS533	ü	ü	ü
DYS388	ü
DYS19	ü	ü	ü	ü	ü	ü
DYS392	ü	ü	ü	ü	ü	ü
DYS456	ü	ü	ü	ü
DYS447	ü
DYS444	ü
DYS645	ü
rs771783753	ü
rs759551978	ü
DYS643	ü		ü
DYS460	ü	ü
DYS437	ü	ü	ü	ü		ü
DYS439	ü	ü	ü	ü		ü
DYS557	ü
DYS385a,b	ü	ü	ü	ü	ü	ü
DYF387S1	ü	ü
DYS522	ü
DYS438	ü	ü	ü	ü		ü
DYS389I	ü	ü	ü	ü	ü	ü
DYS448	ü	ü	ü	ü
DYS389II	ü	ü	ü	ü	ü	ü
DYS596	ü
GATA_H4	ü	ü	ü	ü
DYS518	ü	ü
DYS393	ü	ü	ü	ü	ü	ü
DYS391	ü	ü	ü	ü	ü	ü
DYS390	ü	ü	ü	ü	ü	ü
DYS635	ü	ü	ü	ü
DYS449	ü	ü
DYS458	ü	ü	ü	ü
DYS593	ü
DYS549	ü		ü
DYS576	ü	ü	ü
DYS570	ü	ü	ü
DYS481	ü	ü	ü
DYS627	ü	ü
DYS527	ü
DYF404S1	ü
