# Supplementary material for: Comprehensive analyses of genetic diversities and population structure of the Guizhou Dong group based on 44 Y-markers
Source: PeerJ. 2023 Sep 25;11:e16183. doi: 10.7717/peerj.16183 (PMC10538297; doi:10.7717/peerj.16183)
Supplement: Supplemental Information 4 [file peerj-11-16183-s004.xlsx]

## Sheet: Supplementary Table 4
Supplementary Table 4. Evaluation of the effectiveness of different Y-STR sets.
Different Y-STR sets	HMP	DC	HD	Haplotype numbers	Sample Size
minimal	0.0117519	0.721154	0.991426	225	312
PowerPlex Y	0.00957408	0.772461	0.993611	241	312
Yfiler	0.00495129	0.859004	0.998248	268	312
PowerPlexY23	0.00369793	0.93273	0.999506	291	312
Yfilerplus	0.00338977	0.971193	0.999815	303	312
44 Y-markers	0.00336922	0.974398	0.999835	304	312
