# Supplementary material for: Comprehensive analyses of genetic diversities and population structure of the Guizhou Dong group based on 44 Y-markers
Source: PeerJ. 2023 Sep 25;11:e16183. doi: 10.7717/peerj.16183 (PMC10538297; doi:10.7717/peerj.16183)
Supplement: Supplemental Information 5 [file peerj-11-16183-s005.xlsx]

## Sheet: Supplementary Table 5
Supplementary Table 5 The pairwise RST values in the Dong population of Guizhou and 16 other reference populations from China.
Population	GuizhouDong	GuizhouBouyei	YunnanDai	HunanDong	GuizhouHan	YunnanHan	YunnanHui	GuizhouMiao	Mongolian	SichuanQiang	QinghaiSalar	QinghaiTibetan	GuizhouTujia	GuizhouYi	YunnanYi	GansuYugur	GuangxiZhuang
GuizhouDong	0	0.0605	0.0982	0.0162	0.0283	0.0463	0.0348	0.0812	0.0576	0.0573	0.0838	0.155	0.0211	0.0261	0.1573	0.0473	0.0432
GuizhouBouyei	0.0605	0	0.0625	0.0543	0.0173	0.0425	0.0558	0.0441	0.1225	0.0425	0.0812	0.2384	0.045	0.0376	0.1481	0.0884	0.018
YunnanDai	0.0982	0.0625	0	0.0836	0.0502	0.0619	0.0941	0.1174	0.1593	0.1181	0.1454	0.2968	0.1072	0.0709	0.1643	0.1389	0.02
HunanDong	0.0162	0.0543	0.0836	0	0.028	0.0473	0.0232	0.0917	0.0451	0.0678	0.0604	0.1717	0.016	0.0254	0.136	0.0653	0.0382
GuizhouHan	0.0283	0.0173	0.0502	0.028	0	0.0113	0.0273	0.0326	0.0922	0.0436	0.0717	0.2105	0.0197	0.0124	0.1207	0.0579	0.0104
YunnanHan	0.0463	0.0425	0.0619	0.0473	0.0113	0	0.0315	0.0372	0.1021	0.0639	0.0794	0.2042	0.0269	0.0196	0.0893	0.0505	0.0278
YunnanHui	0.0348	0.0558	0.0941	0.0232	0.0273	0.0315	0	0.0624	0.0554	0.0697	0.0276	0.158	0.0238	0.0221	0.0887	0.0499	0.0456
GuizhouMiao	0.0812	0.0441	0.1174	0.0917	0.0326	0.0372	0.0624	0	0.1454	0.0711	0.0917	0.2355	0.0568	0.0568	0.1246	0.0883	0.059
Mongolian	0.0576	0.1225	0.1593	0.0451	0.0922	0.1021	0.0554	0.1454	0	0.1072	0.0975	0.1551	0.0652	0.0875	0.1764	0.0781	0.1038
SichuanQiang	0.0573	0.0425	0.1181	0.0678	0.0436	0.0639	0.0697	0.0711	0.1072	0	0.1031	0.151	0.0444	0.0575	0.1974	0.0382	0.0593
QinghaiSalar	0.0838	0.0812	0.1454	0.0604	0.0717	0.0794	0.0276	0.0917	0.0975	0.1031	0	0.1672	0.0555	0.0633	0.0992	0.0762	0.0924
QinghaiTibetan	0.155	0.2384	0.2968	0.1717	0.2105	0.2042	0.158	0.2355	0.1551	0.151	0.1672	0	0.1572	0.1879	0.2646	0.0768	0.2393
GuizhouTujia	0.0211	0.045	0.1072	0.016	0.0197	0.0269	0.0238	0.0568	0.0652	0.0444	0.0555	0.1572	0	0.023	0.1249	0.036	0.0488
GuizhouYi	0.0261	0.0376	0.0709	0.0254	0.0124	0.0196	0.0221	0.0568	0.0875	0.0575	0.0633	0.1879	0.023	0	0.0942	0.0531	0.0267
YunnanYi	0.1573	0.1481	0.1643	0.136	0.1207	0.0893	0.0887	0.1246	0.1764	0.1974	0.0992	0.2646	0.1249	0.0942	0	0.1568	0.126
GansuYugur	0.0473	0.0884	0.1389	0.0653	0.0579	0.0505	0.0499	0.0883	0.0781	0.0382	0.0762	0.0768	0.036	0.0531	0.1568	0	0.0853
GuangxiZhuang	0.0432	0.018	0.02	0.0382	0.0104	0.0278	0.0456	0.059	0.1038	0.0593	0.0924	0.2393	0.0488	0.0267	0.126	0.0853	0
